# Supplementary material for: Graphene bandgap induced by ferroelectric Pca21 HfO2 substrates: a first-principles study
Source: Royal Society of Chemistry journal article supplement (doi:10.1039/c9cp01786k), 2019-01-01
Supplement: c9cp01786k1.pdf [file c9cp01786k1.pdf]

**Supplementary Information for:**

**Graphene bandgap induced by ferroelectric  $Pca2_1$  HfO<sub>2</sub> substrate:  
a first-principles study**

**George Alexandru Nemnes<sup>\*,a,b</sup>, Daniela Dragoman<sup>a,c</sup> and Mircea Dragoman<sup>d</sup>**

<sup>a</sup>University of Bucharest, Faculty of Physics, Materials and Devices for Electronics and  
Optoelectronics Research Center, 077125 Magurele-Ilfov, Romania

<sup>b</sup>Horia Hulubei National Institute for Physics and Nuclear Engineering, 077126  
Magurele-Ilfov, Romania

<sup>c</sup>Academy of Romanian Scientists, Splaiul Independentei 54, Bucharest 050094, Romania

<sup>d</sup>National Research and Development Institute in Microtechnology, Str. Erou Iancu Nicolae  
126A, Bucharest 077190, Romania.

**Corresponding Author:** \* E-mail: nemnes@solid.fizica.unibuc.ro

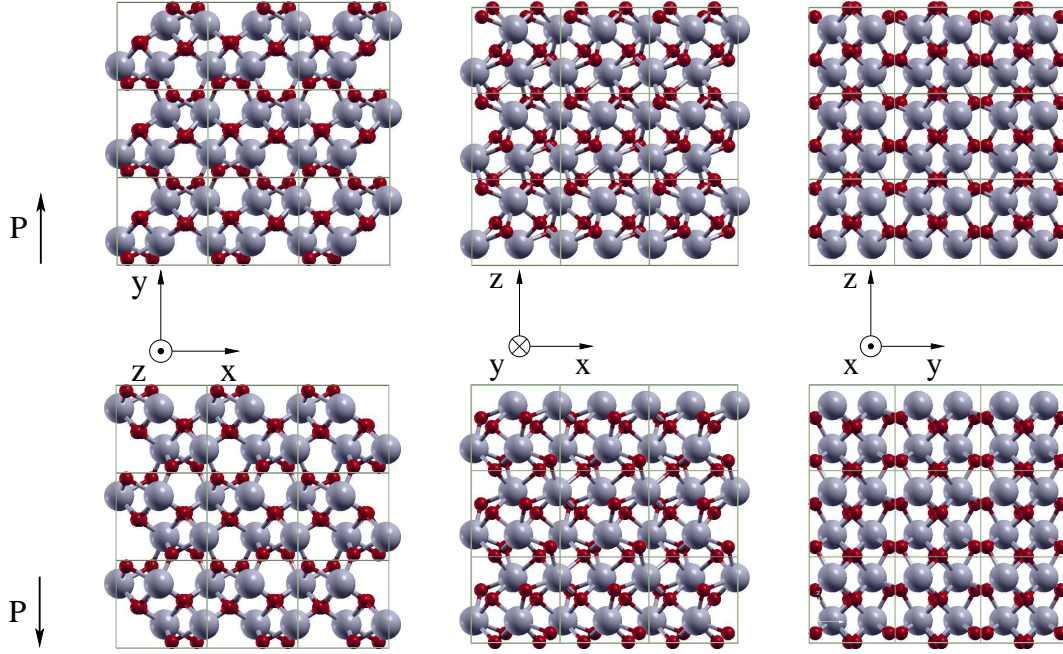

Figure S1: Atomic configurations of bulk  $\text{HfO}_2$  with space group  $\text{Pca}2_1$ , exposing  $(x, y)$ ,  $(x, z)$  and  $(y, z)$  faces, for  $P$  and  $-P$  polarizations. Color codes: Hf – gray, O– red.

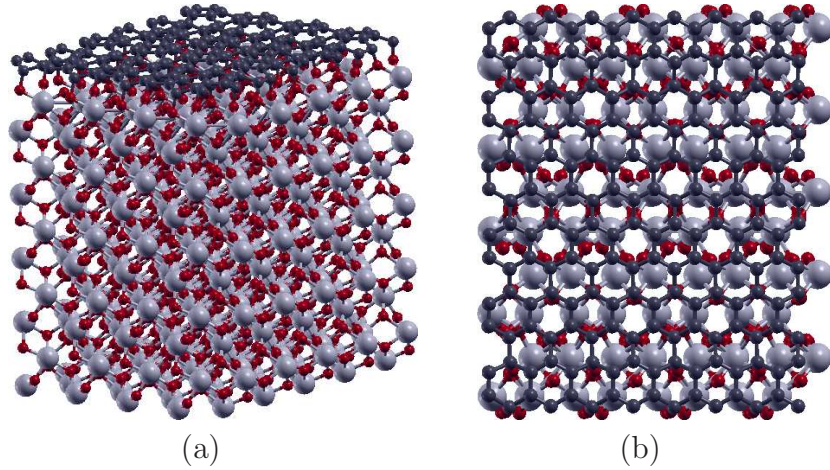

Figure S2: Graphene on top of the  $\text{HfO}_2$  slab, depicting a  $4 \times 5 \times 5$  supercell for a better visualization of the G@O-Hf system: (a) 3D view and (b) top view. In this case, graphene interacts with the O-terminated  $\text{HfO}_2$  slab.

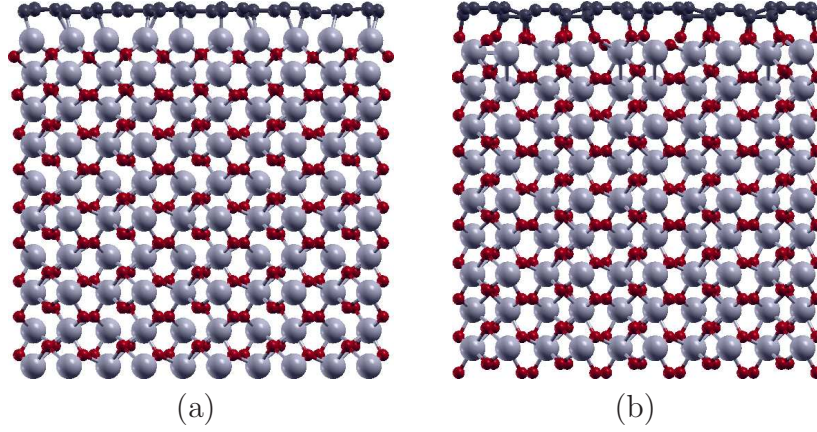

Figure S3: Graphene on top of  $\text{HfO}_2$  slabs with symmetric terminations: (a)  $\text{G@Hf-Hf}$  and (b)  $\text{G@O-O}$ .

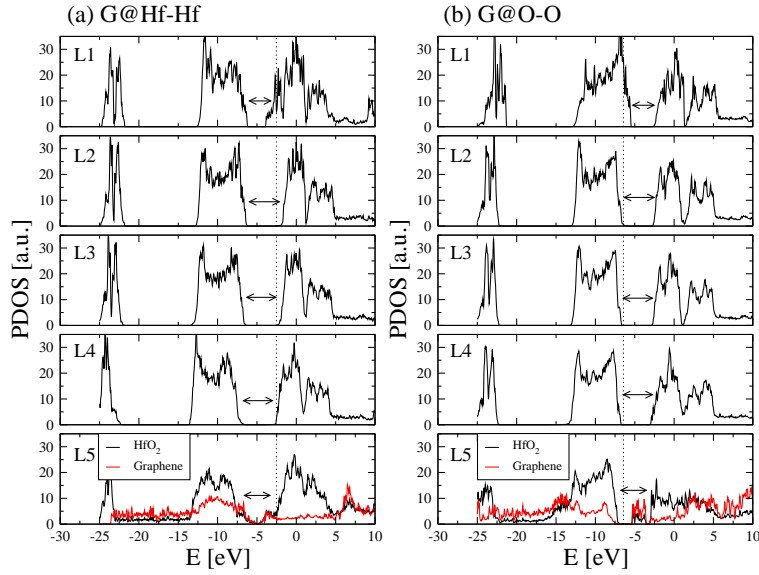

Figure S4: Partial density of states (PDOS) for (a)  $\text{G@Hf-Hf}$  and (b)  $\text{G@O-O}$ . Compared to the asymmetrically terminated slabs,  $\text{G@Hf-O}$  and  $\text{G@O-Hf}$ , the large shift induced by the polar surfaces is not anymore present. However, there is a similar behavior in PDOS for the interfacial  $\text{HfO}_2$  layer and graphene, concerning the energy gaps. One notable difference is found in the slightly shifted Fermi level compared to the  $\text{G@O-Hf}$  system, which now enters the gap, suggesting that the bottom terminations of the  $\text{HfO}_2$  slab or the base substrate can influence the transport properties of graphene.

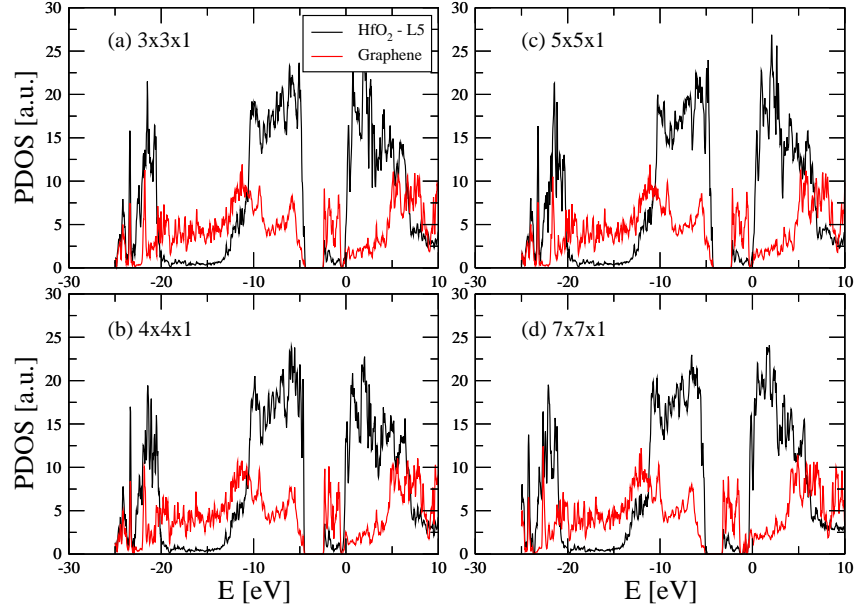

Figure S5: PDOS of the  $\text{HfO}_2$  interfacial layer and graphene in  $\text{G@O-Hf}$  system, for several Monkhorst-Pack k-grids: (a)  $3 \times 3$  (reference), (b)  $4 \times 4$ , (c)  $5 \times 5$  and (d)  $7 \times 7$ .

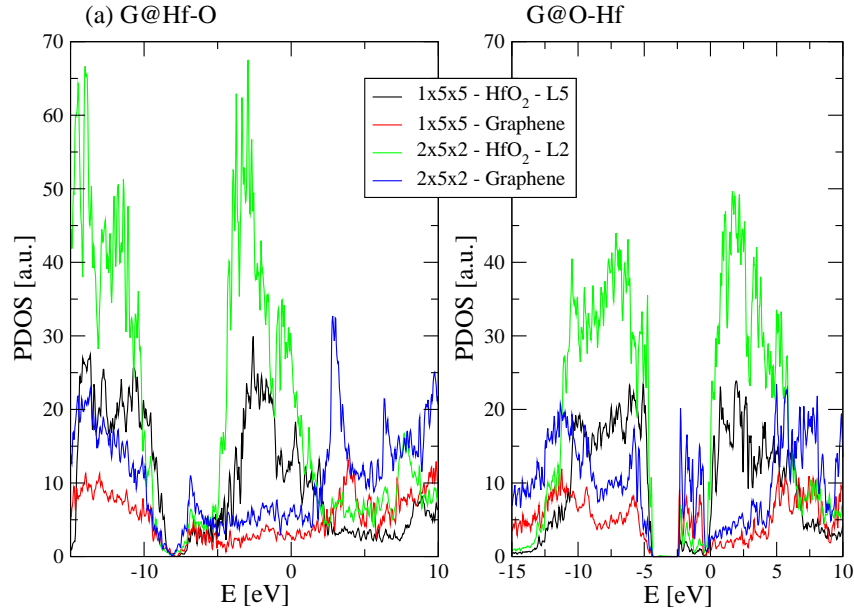

Figure S6: Comparison between two different supercells: PDOS of the  $\text{HfO}_2$  interfacial layers and graphene in (a)  $\text{G@Hf-O}$  and (b)  $\text{G@O-Hf}$  systems, for the reference  $1 \times 5 \times 5$  system (solid lines) and the  $2 \times 5 \times 2$  system (dashed lines). Energy gap sizes in the range of 0.1-0.25 eV for  $\text{G@Hf-O}$  and  $\sim 1.8$  eV for  $\text{G@O-Hf}$  are observed. Due to the double size along the  $x$  direction for the  $2 \times 5 \times 2$  system, the number of states corresponding to graphene and L2 interfacial layer is two times larger.

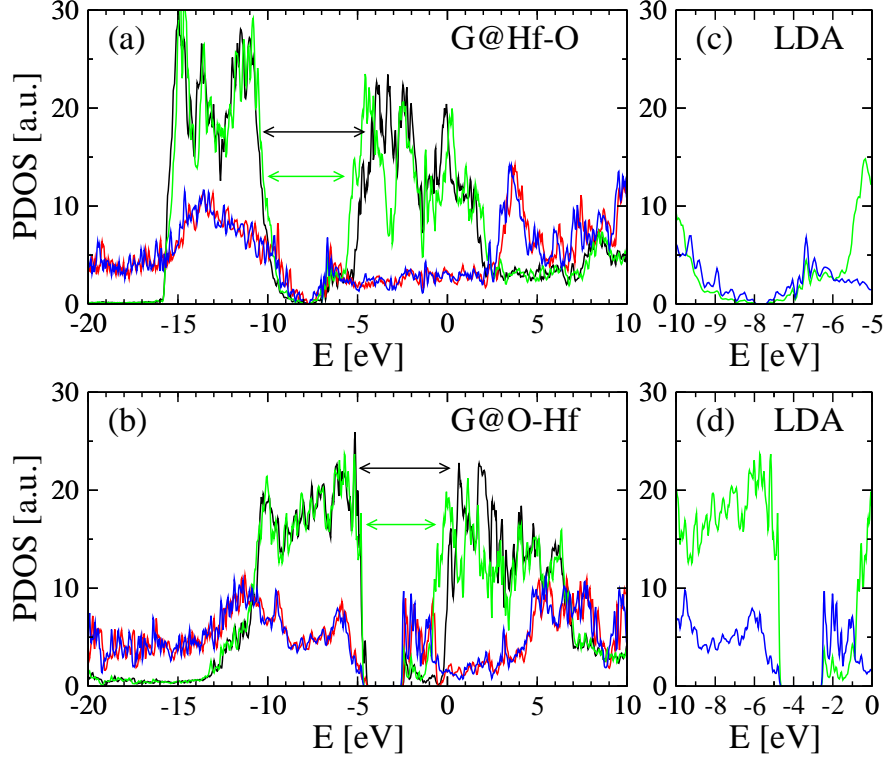

Figure S7: A comparison between LDA+U and LDA for (a) G@Hf-O and (b) G@O-Hf, with a detailed representation of the LDA PDOS indicated in (c) and (d) plots, respectively. Contributions corresponding to HfO<sub>2</sub> L5 interfacial layer and graphene are depicted: LDA+U – HfO<sub>2</sub> (black), graphene (red); LDA – HfO<sub>2</sub> (green), graphene (blue). Using LDA the bulk-like gap of the L5 layer is reduced with  $\approx 1$  eV, but the contribution to the in-gap states is rather similar and consequently, also the gaps induced in graphene are about the same magnitude as for the LDA+U approach.
